# Supplementary material
Source: PubMed Central journal article supplement (PMC2867927)

**Fig. S3** Uncertainty analysis

a) Percent of variation of  $BAL_{soil}$  explained by  $IN_{fer}$

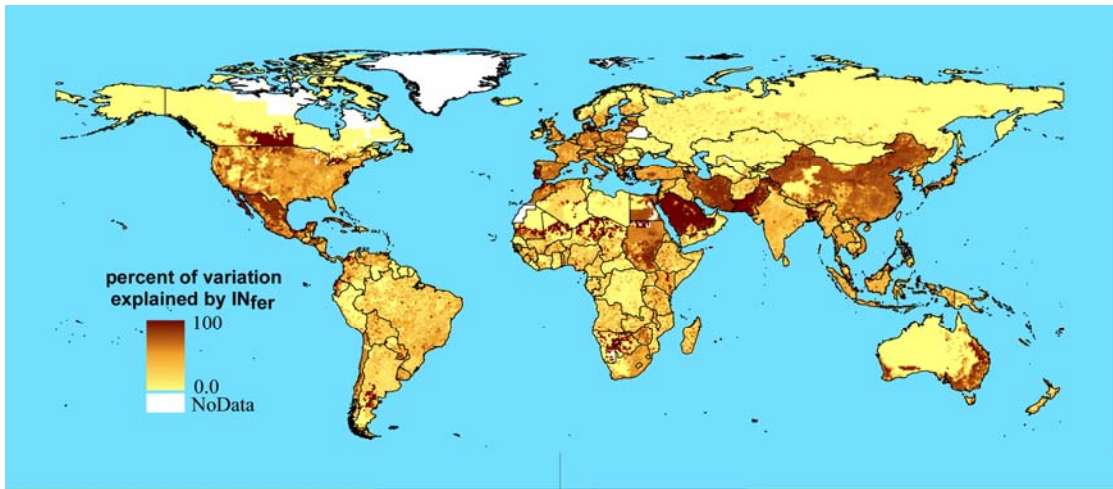

b) Percent of variation of  $BAL_{soil}$  explained by  $IN_{man}$

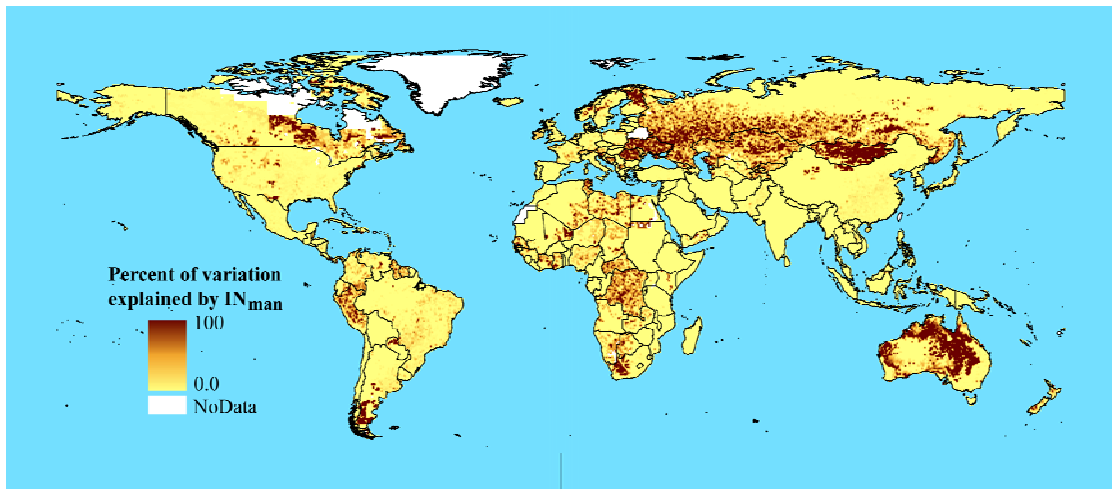

c) Percent of variation of  $BAL_{soil}$  explained by  $IN_{dep}$

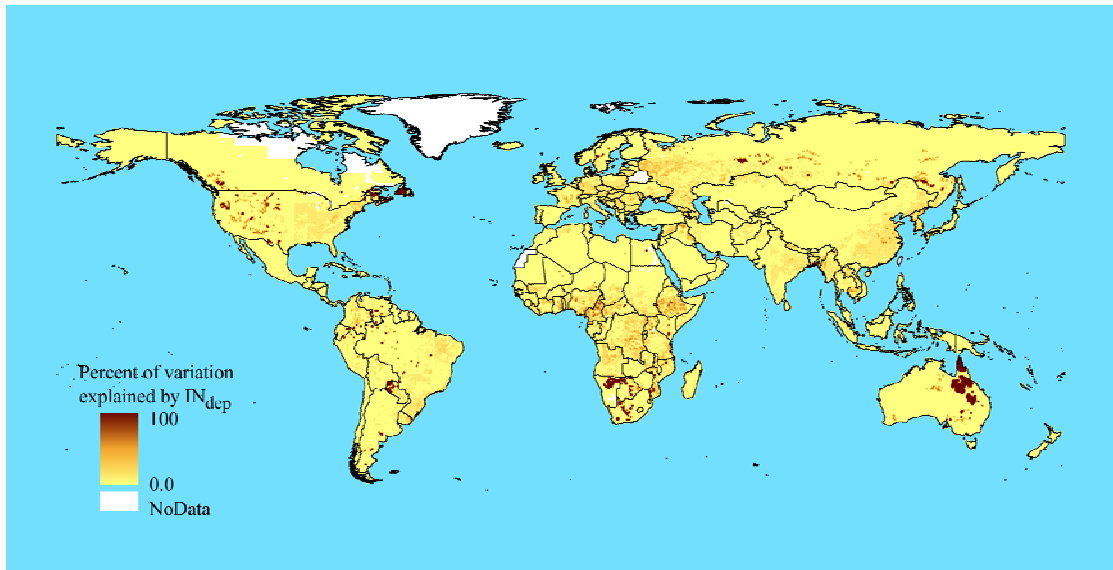

d) Percent of variation of  $BAL_{soil}$  explained by  $IN_{fix}$

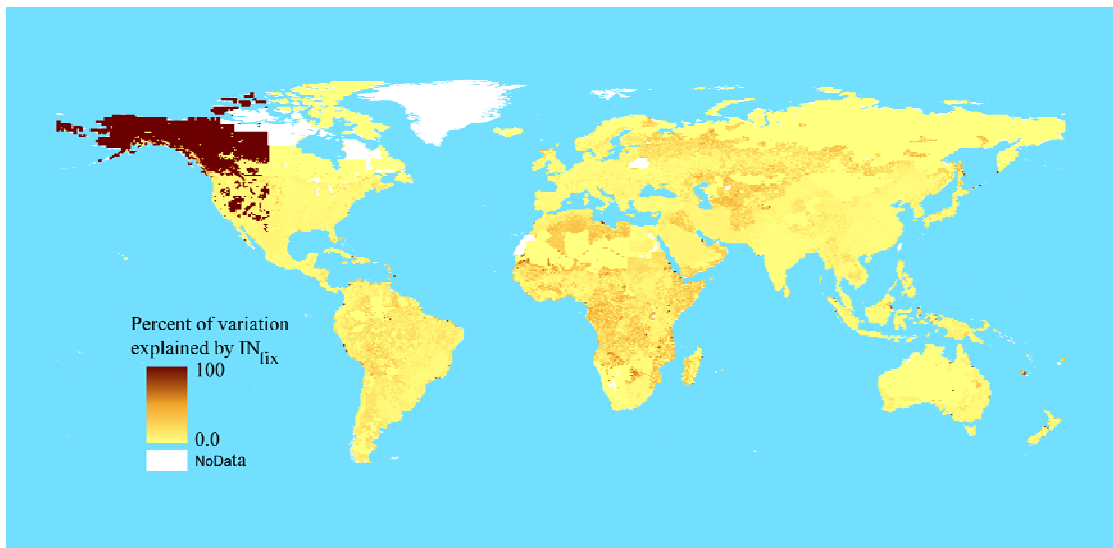

e) Percent of variation of  $BAL_{soil}$  explained by  $IN_{sed}$

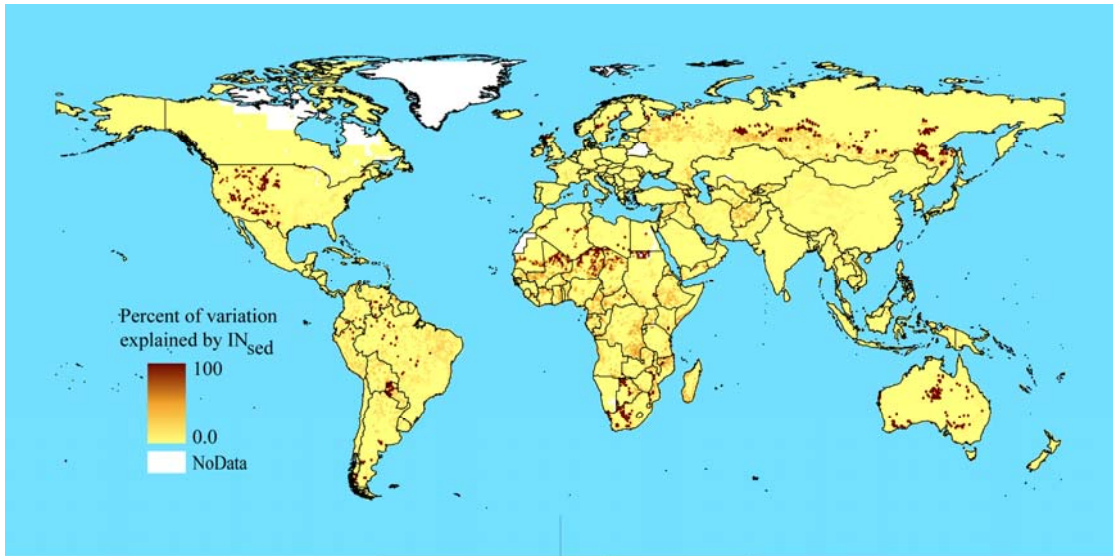

f) Percent of variation of  $BAL_{soil}$  explained by  $IN_{res}$

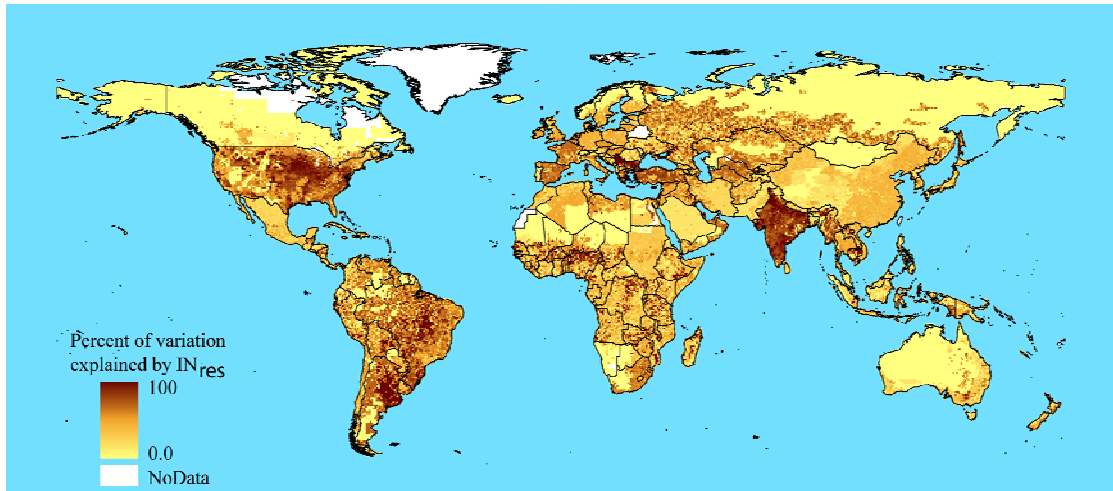

g) Percent of variation of  $BAL_{soil}$  explained by  $OUT_{crop}$

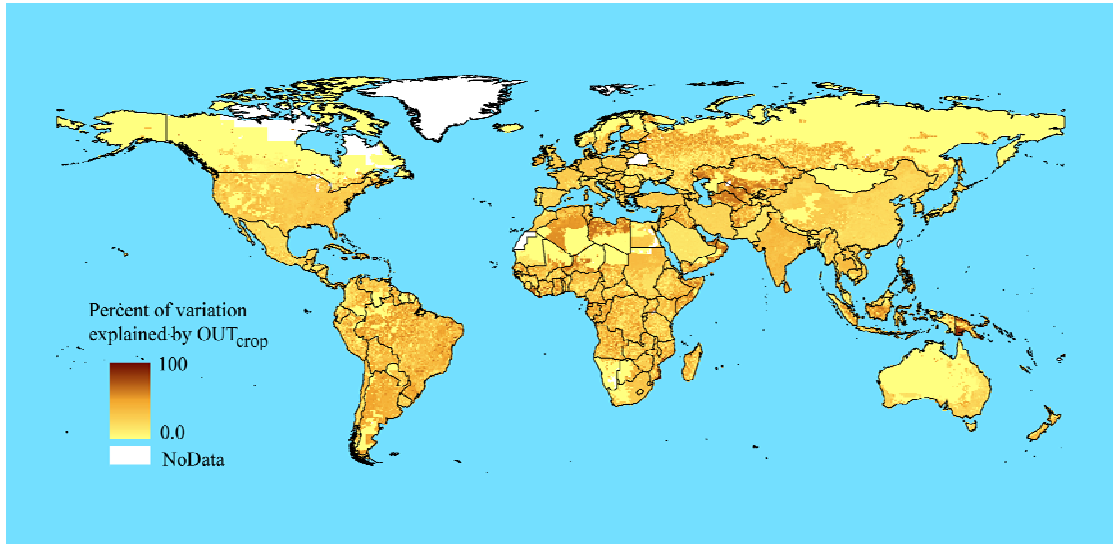

h) Percent of variation of  $BAL_{soil}$  explained by  $OUT_{res}$

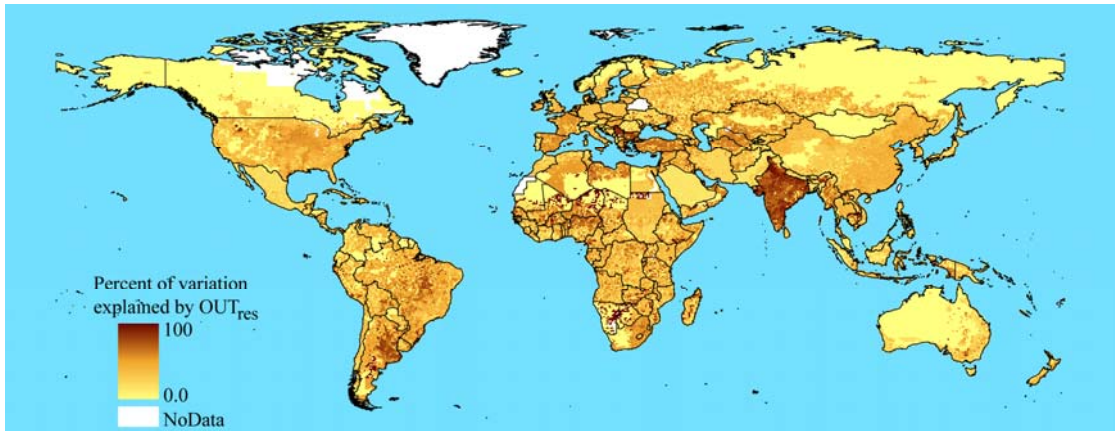



i) Percent of variation of  $BAL_{soil}$  explained by  $OUT_{lea}$

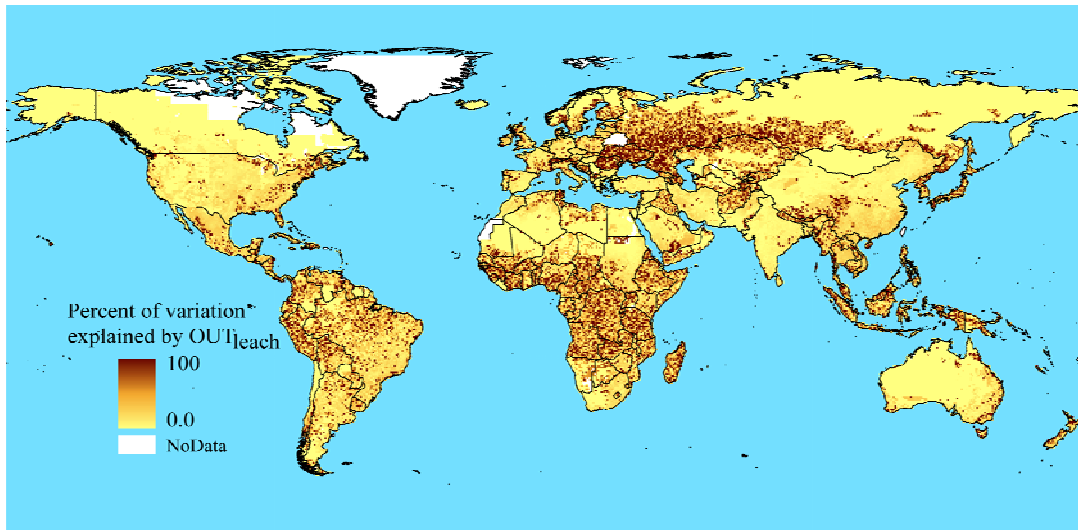

j) Percent of variation of  $BAL_{soil}$  explained by  $OUT_{gas}$

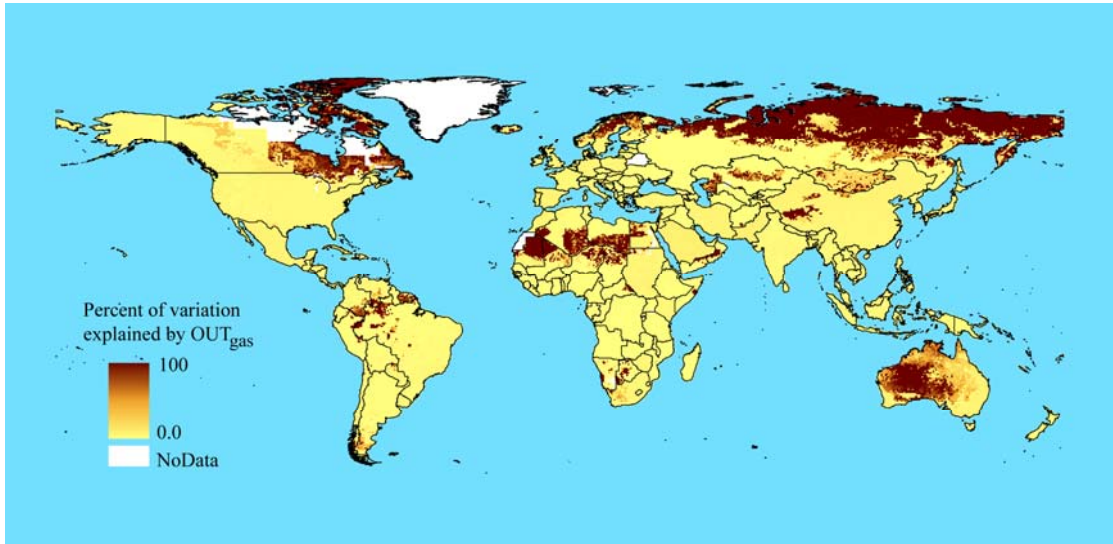

k) Percent of variation of  $BAL_{soil}$  explained by  $OUT_{ero}$

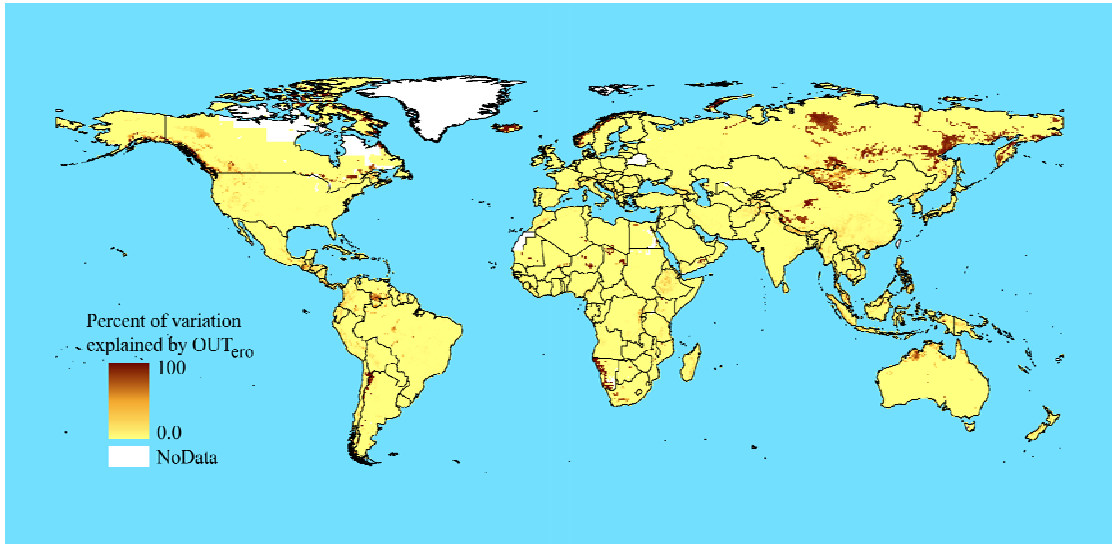

Supplement: 0913658107_sfig03.pdf [file 0913658107_sfig03.pdf]
